# Supplementary material
Source: PubMed Central journal article supplement (PMC156726)
Supplement: nar_31_11_2944__1.pdf [file nar_31_11_2944__1.pdf]

## Supplementary Material

### Chemical shifts (ppm) of the [TAGGGTTA]<sub>4</sub>-distamycin complex

| DNA | H6/H8 | H1/H2/CH <sub>3</sub> | H1', H2'   | Distamycin         |      |
|-----|-------|-----------------------|------------|--------------------|------|
| T1  | 7.22  | 1.65                  | 6.06, 1.81 | CH <sub>3</sub> -1 | 3.51 |
| A2  | 8.23  | 7.96                  | 6.18       | CH <sub>3</sub> -2 | 3.49 |
| G3  | 7.94  | 11.51                 | 5.99       | CH <sub>3</sub> -3 | 3.59 |
| G4  | 7.67  | 11.19                 | 5.97       | H3-1               | 6.34 |
| G5  | 7.59  | 10.80                 | 6.18       | H3-2               | 6.34 |
| T6  | 7.46  | 1.79                  | 6.07, 2.19 | H3-3               | 6.51 |
| T7  | 7.28  | 1.68                  | 5.86, 1.85 | H5-1               | 6.77 |
| A8  | 8.12  | 7.89                  | 6.16       | H5-2               | 6.71 |
|     |       |                       |            | H5-3               | 6.80 |
|     |       |                       |            | HF                 | 7.84 |

**Chemical shifts (ppm) of [TAGGGTTA]<sub>4</sub>**

| DNA | H6/H8 | H1/H2/CH <sub>3</sub> | H1', H2'   |
|-----|-------|-----------------------|------------|
| T1  | 7.15  | 1.54                  | 5.87, 1.72 |
| A2  | 8.24  | 7.97                  | 6.15       |
| G3  | 7.99  | 11.52                 | 5.99       |
| G4  | 7.67  | 11.26                 | 5.96       |
| G5  | 7.63  | 10.82                 | 6.18       |
| T6  | 7.40  | 1.71                  | 6.05, 2.20 |
| T7  | 7.29  | 1.66                  | 5.86, 1.83 |
| A8  | 8.07  | 7.82                  | 6.13       |

**Chemical shifts (ppm) of the [TAGGGTT]<sub>4</sub>-distamycin complex**

| DNA | H6/H8 | H1/H2/ CH <sub>3</sub> | H1', H2'   | Distamycin         |      |
|-----|-------|------------------------|------------|--------------------|------|
| T1  | 7.24  | 1.69                   | 6.12, 1.83 | CH <sub>3</sub> -1 | 3.59 |
| A2  | 8.25  | 7.91                   | 6.20       | CH <sub>3</sub> -2 | 3.58 |
| G3  | 7.90  | 11.42                  | 5.96       | CH <sub>3</sub> -3 | 3.64 |
| G4  | 7.64  | 11.06                  | 6.06       | H3-1               | 6.48 |
| G5  | 7.75  | 10.97                  | 6.05       | H3-2               | 6.54 |
| G6  | 7.59  | 10.96                  | 6.18       | H3-3               | 6.58 |
| T7  | 7.49  | 1.81                   | 6.09, 2.25 | H5-1               | 6.87 |
| T8  | 7.45  | 1.68                   | 6.04, 2.16 | H5-2               | 6.82 |
|     |       |                        |            | H5-3               | 6.88 |
|     |       |                        |            | HF                 | 7.97 |

**Chemical shifts (ppm) of [TAGGGGTT]<sub>4</sub>**

| DNA | H6/H8 | H1/H2/ CH <sub>3</sub> | H1', H2'   |
|-----|-------|------------------------|------------|
| T1  | 7.14  | 1.55                   | 5.87, 1.72 |
| A2  | 8.23  | 7.97                   | 6.16       |
| G3  | 8.04  | 11.42                  | 5.98       |
| G4  | 7.64  | 11.06                  | 6.05       |
| G5  | 7.76  | 10.98                  | 6.04       |
| G6  | 7.59  | 10.93                  | 6.16       |
| T7  | 7.26  | 1.68                   | 5.90, 2.14 |
| T8  | 7.40  | 1.63                   | 5.99, 2.12 |

**Chemical shifts (ppm) of the [TAGGGGT]<sub>4</sub>-distamycin complex**

| DNA | H6/H8 | H1/H2/ CH <sub>3</sub> | H1', H2'   | Distamycin         |      |
|-----|-------|------------------------|------------|--------------------|------|
| T1  | 7.20  | 1.68                   | 6.13, 1.84 | CH <sub>3</sub> -1 | 3.54 |
| A2  | 8.20  | 7.93                   | 6.19       | CH <sub>3</sub> -2 | 3.51 |
| G3  | 7.84  | 11.37                  | 5.95       | CH <sub>3</sub> -3 | 3.61 |
| G4  | 7.51  | 10.91                  | 6.00       | H3-1               | 6.44 |
| G5  | 7.63  | 10.74                  | 6.06       | H3-2               | 6.36 |
| G6  | 7.69  | 10.78                  | 6.02       | H3-3               | 6.49 |
| G7  | 7.58  | 10.69                  | 6.17       | H5-1               | 6.78 |
| T8  | 7.50  | 1.80                   | 6.18, 2.29 | H5-2               | 6.70 |
|     |       |                        |            | H5-3               | 6.80 |
|     |       |                        |            | HF                 | 7.86 |

**Chemical shifts (ppm) of [TAGGGGT]<sub>4</sub>**

| DNA | H6/H8 | H1/H2/ CH <sub>3</sub> | H1', H2'   |
|-----|-------|------------------------|------------|
| T1  | 7.08  | 1.52                   | 5.85, 1.70 |
| A2  | 8.17  | 7.92                   | 6.13       |
| G3  | 7.89  | 11.35                  | 5.97       |
| G4  | 7.53  | 10.96                  | 6.00       |
| G5  | 7.65  | 10.77                  | 6.06       |
| G6  | 7.72  | 10.82                  | 6.00       |
| G7  | 7.58  | 10.82                  | 6.19       |
| T8  | 7.26  | 1.61                   | 6.03, 2.16 |
